# Supplementary material
Source: Frontiers journal article supplement (https://www.frontiersin.org/articles/464451)
Supplement: Table_1.pdf [file Table_1.pdf]

**Supplemental Table 1: Demographic information for each subject.** Peripheral blood mononuclear cells (PBMCs) were previously obtained from 5 healthy individuals (S1-S5) and sequenced using single-cell barcoding in emulsion<sup>18,19</sup>. The original PBMC samples from S1 and S3, as well as new samples from additional healthy individuals (S6,S7), were sequenced using a commercially available single-cell system (10x Genomics)<sup>17</sup>. In all, we obtain 70,108 and 26,946 unique TCR pairs from CD4<sup>+</sup> CD8<sup>+</sup> T cells, respectively. Demographic information, as well as HLA types, are provided as available<sup>19</sup>.

|                         | Subject 1      | Subject 2      | Subject 3       | Subject 4   | Subject 5 | Subject 6 | Subject 7 | Total  |
|-------------------------|----------------|----------------|-----------------|-------------|-----------|-----------|-----------|--------|
| <b>Age (Gender)</b>     | 65 (Female)    | 69 (Male)      | 34 (Male)       | 33 (Female) | 37 (Male) | -         | -         | -      |
| <b>Platform(s)</b>      | Abvitro + 10x  | Abvitro        | Abvitro + 10x   | Abvitro     | Abvitro   | 10x       | 10x       |        |
| <b>Unique CD4 pairs</b> | 11,435+316     | 9,961          | 20,296+46       | 4,310       | 17,251    | 772       | 5,721     | 70,108 |
| <b>Unique CD8 pairs</b> | 4,649+27       | 2,007          | 2,652+33        | 7,049       | 6,658     | 101       | 3,770     | 26,946 |
| <b>HLA-A</b>            | 24:02/24:02    | 03:01/26:01    | 68:01/68:02     | 02:01/02:01 | -         | -         | -         |        |
| <b>HLA-B</b>            | 18:01/44:02    | 40:01/51:01    | 35:01/48:01     | 51:01/51:01 | -         | -         | -         |        |
| <b>HLA-C</b>            | 05:01/07:01    | 01:02/03:04    | 04:01/08:01     | 01:02/14:02 | -         | -         | -         |        |
| <b>HLA-DPA1</b>         | 01:03/01:03    | 01:03/02:01    | 01:03/01:03     | 01:03/01:03 | -         | -         | -         |        |
| <b>HLA-DPB1</b>         | 04:02/20:01    | 04:01/14:01    | 04:01/04:02     | 04:01/04:01 | -         | -         | -         |        |
| <b>HLA-DQA1</b>         | 01:01/05:05    | 01:01/03:02    | 01:02/03:01     | 01:02/03:03 | -         | -         | -         |        |
| <b>HLA-DQB1</b>         | 03:01/05:01    | 03:03/05:01    | 03:02/05:02     | 03:02/06:02 | -         | -         | -         |        |
| <b>HLA-DRB1</b>         | 01:01/11:01    | 01:01/05:01    | 04:04/16:01     | 04:01/15:01 | -         | -         | -         |        |
| <b>HLA-DRB3/4/5</b>     | 3*02:02/Absent | 3*01:01/Absent | 4*01:03/5*02:02 | 01:03/01:01 | -         | -         | -         |        |
